# Supplementary material for: Molecular and Clinical Significance of Stanniocalcin-1 Expression in Breast Cancer Through Promotion of Homologous Recombination-Mediated DNA Damage Repair
Source: Front Cell Dev Biol. 2021 Oct 15;9:731086. doi: 10.3389/fcell.2021.731086 (PMC8554131; doi:10.3389/fcell.2021.731086)
Supplement: Supplementary file 5 [file Table_3.XLSX]

## Sheet: Clinical characteristics
	Source of tissue	grade	staining intensity	positive rate	score	expression	age<55	Overall Survival time（months）	Overall Survival status	Recurrence-free Survival time（months）	Recurrence-free Survival status	Pathological grading	Pathological type	Vascular invasion	T	N	M	TNM	AJCC sixth edition	LuminaA:1 LuminaB:2 Her-2(+):3 TNBC:4	FISH data of Her-2(++)	ER	PR	E-cad	HCK	SMA	S-100	P53	bcl-2
A01	cancer	Ⅱ	1	0.6	0.6	low	1	132	0	132	0	2	invasive ductal carcinoma	0	1	0	0	1	1	2	1	1	1			0		0
A02	cancer	Ⅱ	2	1	2	high	0	131	0	131	0	2	other	0	2	0	0	2	2	2	1	1	1			0		0
A03	cancer	Ⅲ	1	1	1	low	0	78	1	47	1	2	invasive ductal carcinoma	0	2	3	0	2	3	4	0	0	0	1		1		0
A04	cancer	Ⅱ	1	1	1	low	1	131	0	131	0	2	invasive ductal carcinoma	1	1	1	0	2	2	1	0	1	1	1
A05	cancer	Ⅱ	1	1	1	low	1	131	0	131	0	2	invasive ductal carcinoma	0	1	0	0	1	1	1	0	1	0
A06	cancer	Ⅱ	1	1	1	low	1	131	0	131	0	2	invasive ductal carcinoma	0	2	1	0	2	2	2	1	1	1	0		0		0	1
A07	cancer	Ⅱ.	1	0.6	0.6	low	0	130	0	101	1	2	other	0	2	2	0	2	3	2	1	1	0						0
A08	cancer	Ⅱ-Ⅲ	2	1	2	high	1	130	0	130	0	2	invasive ductal carcinoma	0	2	2	0	2	3	1	0	1	0	1	1	0
A09	cancer	Ⅱ.	1	1	1	low	1	130	0	130	0	2	invasive ductal carcinoma	0	2	3	0	2	3	1	0	1	1	0	0				1
A10	cancer	Ⅱ.	1	1	1	low	0	130	0	130	0	2	invasive ductal carcinoma	0	1	0	0	1	1	2	1	1	1	1		0	1
A11	cancer	Ⅱ.	2	1	2	high	1	56	1	56	1	2	invasive ductal carcinoma	0	2	1	0	2	2	1	0	1	0	1		0	0	0	0
A12	cancer	Ⅱ.	2	1	2	high	1	130	0	130	0	2	invasive ductal carcinoma	1	2	0	0	2	2	1	0	1	1	1	0
A13	cancer	Ⅱ.	1	1	1	low	0	130	0	106	1	2	invasive ductal carcinoma	0	1	2	0	2	3	4	0	0	0	0	0				0
A14	cancer	Ⅱ.	1	1	1	low	1	130	0	130	0	2	invasive ductal carcinoma	0	2	0	0	2	2	1	0	1	1	1	1				0
A15	cancer	Ⅱ.	2	1	2	high	1	86	1	50	1	2	invasive ductal carcinoma	0	2	2	0	2	3			0	0	1	0	0		0
A16	cancer	Ⅱ.	1	1	1	low	0	129	0	129	0	2	invasive ductal carcinoma	0	2	2	0	2	3	3	1	0	0	0				0	0
B01	cancer	Ⅱ.	2	1	2	high	1	129	0	129	0	2	invasive ductal carcinoma	0	1	1	0	2	2	2	1	1	1	0				0
B02	cancer	Ⅱ.	1	1	1	low	1	129	0	129	0	2	invasive ductal carcinoma	1	1	0	0	1	1	1	0	1	0	1				0	1
B03	cancer	Ⅱ.	2	1	2	high	0	129	0	87	1	3	invasive ductal carcinoma	0	2	2	0	2	3	2	1	1	1	1	1			0
B04	cancer	Ⅱ.	1	1	1	low	1	74	1	65	1	2	invasive ductal carcinoma	0	1	2	0	2	3	4	0	0	0	1		0		1
B05	cancer	Ⅱ.	2	1	2	high	0	92	1	63	1	2	invasive ductal carcinoma	0	2	3	0	2	3	1	0	1	1	1				1	0
B06	cancer	Ⅱ.	3	1	3	high	1	26	1	18	1	3	invasive ductal carcinoma	0	2	0	0	2	2	4	0	0	0	0	0			0	0
B07	cancer	Ⅱ.	2	1	2	high	1	129	0	129	0	2	invasive ductal carcinoma	0	1	0	0	1	1	1	0	1	1	0		0		0
B08	cancer	Ⅱ-Ⅲ.	0	0	0	low	1	33	1	19	1	2	invasive ductal carcinoma	0	2	0	0	2	2	4	0	0	0	1			0	1	0
B09	cancer	Ⅱ.	2	1	2	high	1	128	0	108	1	2	invasive ductal carcinoma	0	2	3	0	2	3	1	0	1	1	0	0			0	0
B10	cancer	Ⅱ.	2	1	2	high	1	128	0	88	1	2	invasive ductal carcinoma	1	1	2	0	2	3	1	0	1	1	0			0	0
B11	cancer	Ⅱ.	1	1	1	low	0	128	0	128	0	2	invasive ductal carcinoma	0	1	0	0	1	1	1	0	1	1	0				0	1
B13	cancer	Ⅱ-Ⅲ.	3	1	3	high	1	94	1	76	1	3	invasive ductal carcinoma	0	2	0	0	2	2			0	0	0	0			0
B14	cancer	Ⅲ.	2	1	2	high	0	128	0	128	0	3	invasive ductal carcinoma	0	2	0	0	2	2	4	0	0	0	1				0	1
B15	cancer	Ⅱ-Ⅲ.	0	0	0	low	0	128	0	99	1	2	invasive ductal carcinoma	0	1	0	0	1	1	3	1	0	0	1	0	1			0
B16	cancer	Ⅱ-Ⅲ.	1	0.2	0.2	low	0	127	0	127	0	2	invasive ductal carcinoma	0	2	2	0	2	3	1	0	1	1	1	1			0
C01	cancer	Ⅱ.	3	1	3	high	1	96	1	48	1	3	invasive ductal carcinoma	1	1	2	0	2	3	1	0	1	1	0				1
C02	cancer	Ⅱ.	0.5	0.3	0.15	low	1	127	0	127	0	2	invasive ductal carcinoma	0	2	0	0	2	2	1	0	1	0	0		1	0	0	0
C03	cancer	Ⅱ.	1	1	1	low	1	127	0	127	0	2	invasive ductal carcinoma	0	2	0	0	2	2	4	0	0	0	1				1
C04	cancer	Ⅱ.	2	1	2	high	1	58	1	58	1	2	invasive ductal carcinoma	0	2	1	0	2	2	2	1	1	1	1	0			0
C05	cancer	Ⅱ-Ⅲ.	2	1	2	high	0	127	0	127	0	2	invasive ductal carcinoma	1	1	0	0	1	1	1	0	1	1	0	0	1	1
C06	cancer	Ⅱ.	1	1	1	low	1	127	0	127	0	2	invasive ductal carcinoma	0	2	0	0	2	2	2	1	1	0	0			0	0	1
C07	cancer	Ⅱ.	1	1	1	low	0	127	0	127	0	2	invasive ductal carcinoma	0	2	0	0	2	2	1	0	1	0	0			0	0	0
C08	cancer	Ⅱ-Ⅲ.	1	1	1	low	0	127	0	127	0	2	other	0	1	0	0	1	1		0
C09	cancer	Ⅱ.	2	1	2	high	1	127	0	127	0	2	invasive ductal carcinoma	0	1	0	0	1	1	1	0	1	1	1	0			0
C10	cancer	Ⅱ.	2	1	2	high	1	43	1	43	1	2	invasive ductal carcinoma	0	1	2	0	2	3	1	0	1	1	1	1	0		0
C11	cancer	Ⅱ.	1	1	1	low	0	127	0	127	0	2	invasive ductal carcinoma	0	2	1	0	2	2	1	0	1	0	0	0			0
C12	cancer	Ⅱ.	1	1	1	low	1	127	0	127	0	2	other	0	1	0	0	1	1	1	0	1	1	0	0
C13	cancer	Ⅱ.	1	1	1	low	0	126	0	126	0	2	invasive ductal carcinoma	0	2	0	0	2	2			1	0	0
C14	cancer	Ⅱ.	1	0.7	0.7	low	1	126	0	126	0	2	other	0	2	0	0	2	2			1	0
C15	cancer	Ⅱ-Ⅲ.	2	1	2	high	0	126	0	126	0	2	invasive ductal carcinoma	0	2	2	0	2	3	2	1	1	1	0		1	1
C16	cancer	Ⅱ.	1	0.6	0.6	low	0	72	1	26	1	2	invasive ductal carcinoma	1	2	2	0	2	3	1	0	0	1	1
D01	cancer	Ⅱ.	2	1	2	high	0	126	0	126	0	2	invasive ductal carcinoma	0	1	0	0	1	1	4	0	0	0	1	0	0	0	0	0
D02	cancer	Ⅱ.	1	1	1	low	1	70	1	70	1	2	invasive ductal carcinoma	0	2	0	0	2	2	1	0	1	0	0	0	0	0	0	0
D03	cancer	Ⅱ-Ⅲ.	1	0.35	0.35	low	0	109	1	58	1	2	invasive ductal carcinoma	0	1	0	0	1	1	4	0	0	0	0	0	0	1	0
D04	cancer	Ⅱ.	1	0.6	0.6	low	0	126	0	126	0	2	invasive ductal carcinoma	0	2	0	0	2	2	2	1	1	0		0		0	0	0
D05	cancer	Ⅲ.	1	1	1	low	0	126	0	126	0	2	other	0	1	0	0	1	1	1	0	1	1			0	1
D06	cancer	Ⅱ.	1	1	1	low	0	126	0	126	0	2	invasive ductal carcinoma	0	2	0	0	2	2	1	0	1	0	0	0
D07	cancer	Ⅱ.	1	1	1	low	1	126	0	126	0	2	invasive ductal carcinoma	0	2	0	0	2	2	1	0	1	1	1	0			0
D08	cancer	Ⅱ.	1	1	1	low	1	126	0	126	0	2	invasive ductal carcinoma	0	1	1	0	2	2	1	0	1	1	0	0			0
D09	cancer	Ⅱ.	1	1	1	low	1	58	1	29	1	2	invasive ductal carcinoma	0	1	2	0	2	3	4	0	0	0	0
D10	cancer	Ⅱ.	2	0.9	1.8	high	1	20	0	20	0	2	other	0	2	0	0	2	2	1	0	1	1	1		0	1
D12	cancer	Ⅱ-Ⅲ.	2	1	2	high	0	125	0	125	0	2	other	0	2	2	0	2	3			0	1	0		0
D13	cancer	Ⅱ.	2	1	2	high	0	125	0	125	0	2	invasive ductal carcinoma	0	2	0	0	2	2	1	0		1	1				0
D14	cancer	Ⅱ.	2	0.7	1.4	high	0	125	0	125	0	2	invasive ductal carcinoma	0	2	2	0	2	3	4	0	0	0	1				0	0
D15	cancer	Ⅱ-Ⅲ.	1	1	1	low	0	125	0	125	0	3	invasive ductal carcinoma	1	3	2	0	2	3	4	0	0	0	1				0	0
D16	cancer	Ⅱ-Ⅲ.	1	0.2	0.2	low	1	125	0	125	0	2	other	0	2	0	0	2	2	4	0	0	0			0			0
E01	cancer	Ⅱ.	1	0.3	0.3	low	0	125	0	125	0	2	invasive ductal carcinoma	0	1	2	0	2	3			0	0	1	0		1
E02	cancer	Ⅱ.	2	1	2	high	0	125	0	125	0	2	other	0	1	2	0	2	3	1	0	1	1	0		0
E03	cancer	Ⅱ.	1	1	1	low	0	125	0	125	0	2	invasive ductal carcinoma	1	2	2	0	2	3		1		0	1
E04	cancer	Ⅱ-Ⅲ.	0	0	0	low	1	91	1	81	1	3	invasive ductal carcinoma	0	2	0	0	2	2	1	0	1	1	1	1			0	1
E05	cancer	Ⅱ.	0.5	0.8	0.4	low	0	125	0	125	0	2	invasive ductal carcinoma	0	1	0	0	1	1	1	0	1	1	1	0			1	0
E06	cancer	Ⅱ.	1	1	1	low	0	125	0	125	0	2	invasive ductal carcinoma	0	2	1	0	2	2	1	0	1	1	0		0	1
E07	cancer	Ⅱ.	0.5	0.05	0.025	low	0	125	0	125	0	2	invasive ductal carcinoma	0	1	2	0	2	3	1	0	1	1	1	1			0	1
E08	cancer	Ⅱ.	2	1	2	high	1	124	0	124	0	2	invasive ductal carcinoma	0	2	1	0	2	2	1	0	1	1	0
E09	cancer	Ⅱ-Ⅲ.	2	1	2	high	0	103	1	56	1	2	invasive ductal carcinoma	1	1	3	0	2	3	4	0	0	0	1	0		1		0
E10	cancer	Ⅱ.	2	0.9	1.8	high	1	123	0	123	0	2	other	0	2	0	0	2	2	1	0	1	1
E11	cancer	Ⅱ.	2	0.7	1.4	high	1	123	0	99	1	3	invasive ductal carcinoma	0	2	2	0	2	3	2	1	0	1	1				1
E12	cancer	Ⅱ.	1	0.8	0.8	low	1	123	0	123	0	2	invasive ductal carcinoma	0	1	0	0	1	1	1	0	1	1	1		1	1	0	1
E13	cancer	Ⅱ.	2	1	2	high	1	123	0	103	1	2	invasive ductal carcinoma	0	2	2	0	2	3	1	0	1	1	1		0	1	0	1
E14	cancer	Ⅱ.	1	1	1	low	0	123	0	123	0	2	invasive ductal carcinoma	0	1	0	0	1	1	4	0	0	0	0		0	1
E15	cancer	Ⅱ.	2	1	2	high	0	123	0	123	0	2	invasive ductal carcinoma	0	2	0	0	2	2	1	0	1						0	0
E16	cancer	Ⅱ.	2	1	2	high	1	123	0	123	0	2	invasive ductal carcinoma	0	1	0	0	1	1	1	0	1	1					0
F01	cancer	Ⅱ.	0	0	0	low	0	123	0	78	1	2	invasive ductal carcinoma	0	1	0	0	1	1	3	1	0	0	1			1	0	0
F02	cancer	Ⅱ.	2	1	2	high	1	60	1	60	1	2	invasive ductal carcinoma	0	2	1	0	2	2	1	0	1	1	1		0	1	0	1
F03	cancer	Ⅲ.	1	0.6	0.6	low	1	122	0	122	0	3	invasive ductal carcinoma	0	2	0	0	2	2	1	0	0	1	1	1	0	1	1	1
F04	cancer	Ⅱ.	3	1	3	high	0	122	0	122	0	2	invasive ductal carcinoma	0	2	0	0	2	2	1	0	1	1	0
F05	cancer	Ⅱ.	2	1	2	high	0	98	1	98	1	2	invasive ductal carcinoma	0	2	2	0	2	3	3	1	0	0	1		0		0
F06	cancer	Ⅱ.	2	1	2	high	0	122	0	122	0	2	invasive ductal carcinoma	0	2	0	0	2	2	1	0	1	1	1			1
F07	cancer	Ⅲ.	0	0	0	low	1	82	1	82	1	2	other	0	2	0	0	2	2			0	0	0
F08	cancer	Ⅱ.	2	0.8	1.6	high	0	62	1	42	1	2	invasive ductal carcinoma	0	2	2	0	2	3	2	1	1	1	0		0
F09	cancer	Ⅱ.	1	0.1	0.1	low	0	122	0	122	0	2	invasive ductal carcinoma	0	2	0	0	2	2	1	0	1	1	1
F10	cancer	Ⅱ.	1	1	1	low	0	122	0	122	0	2	invasive ductal carcinoma	0	1	1	0	2	2	1	0	1	1				0	0
F11	cancer	Ⅱ.	2	1	2	high	1	121	0	121	0	2	invasive ductal carcinoma	0	2	0	0	2	2			0	0	0	1
F12	cancer	Ⅱ.	1	1	1	low	0	121	0	121	0	2	invasive ductal carcinoma	0	1	0	0	1	1	4	0	0	0	0	0			0	0
F13	cancer	Ⅱ.	2	1	2	high	1	121	0	121	0	2	invasive ductal carcinoma	0	1	0	0	1	1	2	1	1	0	1	0	1	1	1
F14	cancer	Ⅱ.	1	1	1	low	0	121	0	121	0	2	invasive ductal carcinoma	0	2	1	0	2	2	1	0	1	1	1	0	1	1	0
F15	cancer	Ⅱ.	1	1	1	low	1	121	0	121	0	2	invasive ductal carcinoma	0	2	2	0	2	3	4	0	0	0		1	0	1	0
F16	cancer	Ⅱ.	1	1	1	low	0	121	0	121	0	2	invasive ductal carcinoma	0	2	0	0	2	2	1	0	1	1	1	0			1	1
G01	cancer	Ⅱ.	0	0	0	low	1	121	0	121	0	2	invasive ductal carcinoma	0	2	0	0	2	2			1	1	1	0			0	1
G02	cancer	Ⅱ.	2	1	2	high	0	121	0	121	0	2	invasive ductal carcinoma	0	2	2	0	2	3	4	0	0	0	1	0			0	0
G03	cancer	Ⅱ.	2	1	2	high	1	121	0	121	0	2	invasive ductal carcinoma	0	1	1	0	2	2	3	1	0	0				1
G04	cancer	Ⅱ-Ⅲ.	2	1	2	high	0	120	0	120	0	2	invasive ductal carcinoma	0	2	0	0	2	2	1	0	0	1	0				0
G05	cancer	Ⅱ.	1	1	1	low	0	119	0	119	0	2	invasive ductal carcinoma	0	2	1	0	2	2	1	0	1	0	1	0	1	1	0
G06	cancer	Ⅱ-Ⅲ.	2	1	2	high	1	119	0	119	0	2	invasive ductal carcinoma	1	2	2	0	2	3	1	0	1	1	0	0	1	1
G07	cancer	Ⅱ-Ⅲ.	1	1	1	low	1	119	0	119	0	2	invasive ductal carcinoma	0	1	0	0	1	1	1	0	1	0	1	0	1	0	0
G08	cancer	Ⅱ.	2	1	2	high	1	119	0	119	0	2	invasive ductal carcinoma	0	1	0	0	1	1	1	0	1	0	1	1	1	1	1
G09	cancer	Ⅱ-Ⅲ.	3	1	3	high	1	43	1	27	1	3	invasive ductal carcinoma	0	1	3	0	2	3	4	0	0	0	1	0	1	1
G10	cancer	Ⅱ-Ⅲ.	1	0.05	0.05	low	0	63	1	23	1	2	invasive ductal carcinoma	1	2	2	0	2	3	3	1	0	0	0	0				1
G11	cancer	Ⅱ.	2	1	2	high	0	93	1	57	1	2	invasive ductal carcinoma	0	1	2	0	2	3	2	1	1	1	1		0	1
G12	cancer	Ⅱ.	1	0.65	0.65	low	1	117	0	117	0	2	invasive ductal carcinoma	0	2	2	0	2	3	1	0	1	1					0
G13	cancer	Ⅱ.	1	0.75	0.75	low	1	117	0	117	0	2	invasive ductal carcinoma	0	1	1	0	2	2	1	0	1	0	1	0			0	1
G14	cancer	Ⅱ.	1	1	1	low	0	117	0	117	0	2	invasive ductal carcinoma	0	1	0	0	1	1	4	0	0	0	1		0	0
G15	cancer	Ⅱ-Ⅲ.	0	0	0	low	0	117	0	117	0	2	invasive ductal carcinoma	0	2	1	0	2	2	1	0	1	1	1		0	0
G16	cancer	Ⅱ.	1	0.9	0.9	low	0	117	0	117	0	2	invasive ductal carcinoma	0	2	1	0	2	2	1	0	1	1	1			1
H01	cancer	Ⅱ.	1	1	1	low	0	117	0	117	0	2	invasive ductal carcinoma	0	1	0	0	1	1	1	0	1	0	1	0	1	1	0
H02	cancer	Ⅱ.	2	1	2	high	1	117	0	117	0	2	invasive ductal carcinoma	0	1	0	0	1	1			1	1	0		1		0
H03	cancer	Ⅱ.	3	1	3	high	1	116	0	116	0	2	invasive ductal carcinoma	1	2	2	0	2	3	1	0	1	0	1	0		1	0	1
H04	cancer	Ⅱ.	1	0.2	0.2	low	0	116	0	116	0	2	invasive ductal carcinoma	0	2	0	0	2	2	2	1	1	0	1	0			0	1
H05	cancer	Ⅱ.	2	0.4	0.8	low	0	116	0	93	1	2	invasive ductal carcinoma	1	2	0	0	2	2	1	0	1	1	0	0	0	1	0
H06	cancer	Ⅱ.	3	1	3	high	0	31	1	23	1	3	invasive ductal carcinoma	1	2	3	0	2	3	4	0	0	0	0				0
H07	cancer	Ⅲ.	1	1	1	low	1	57	1	44	1	3	invasive ductal carcinoma	0	1	0	0	1	1	3	1	0	0	1	0			1
H08	cancer	Ⅱ.	2	1	2	high	0	115	0	115	0	2	invasive ductal carcinoma	1	1	0	0	1	1	4	0	0	0
H09	cancer	Ⅱ-Ⅲ.	1	0.4	0.4	low	1	115	0	115	0	2	invasive ductal carcinoma	0	2	0	0	2	2	1	0	1	0	0	0			0
H10	cancer	Ⅱ.	2	1	2	high	0	114	0	114	0	2	invasive ductal carcinoma	0	2	0	0	2	2	4	0	0	0	0	0		0	0
H11	cancer	Ⅱ.	1	1	1	low	0	114	0	114	0	2	invasive ductal carcinoma	0	1	0	0	1	1	4	0	0	0	0	0			0
H12	cancer	Ⅱ.	2	1	2	high	1	114	0	90	1	2	invasive ductal carcinoma	0	1	3	0	2	3	1	0	1	1	0	0	0		0
H13	cancer	Ⅱ.	2	1	2	high	0	114	0	10	1	2	invasive ductal carcinoma	0	2	2	0	2	3	1	0	1	1	0	0	0		0
H14	cancer	Ⅱ.	2	1	2	high	1	77	1	70	1	2	invasive ductal carcinoma	0	2	2	0	2	3	1	0	1	1	0	1			1
H16	cancer	Ⅱ.	1	0.45	0.45	low	1	107	0	107	0	2	invasive ductal carcinoma	0	2	0	0	2	2			0	0		1	0	0
I01	cancer	Ⅱ.	3	1	3	high	0	105	0	105	0	2	invasive ductal carcinoma	0	1	0	0	1	1		0					0	0
I02	cancer	Ⅱ.	2	1	2	high	0	104	0	104	0	2	invasive ductal carcinoma	0	2	0	0	2	2	4	0	0	0	1	0				0
I03	cancer	Ⅱ.	2	1	2	high	0	104	0	104	0	2	invasive ductal carcinoma	0	2	0	0	2	2	1	0	1	0	1	1		1
I04	cancer	Ⅱ.	1	1	1	low	1	102	0	102	0	2	invasive ductal carcinoma	0	1	2	0	2	3			1	0	1	0		1
I05	cancer	Ⅱ.	3	1	3	high	1	78	0	78	0	2	invasive ductal carcinoma	0	1	1	0	2	2	1	0	1	1	0	1			1
I06	cancer	Ⅱ.	2	1	2	high	1	78	0	35	1	3	invasive ductal carcinoma	0	2	0	0	2	2	1	0	1	1	1	0	0		1
I07	cancer	Ⅱ.	2	1	2	high	1	78	0	77	1	2	invasive ductal carcinoma	0	3	0	0	2	2	1	0	1	1	1	1			0
I08	cancer	Ⅱ.	3	1	3	high	0	65	0	65	0	2	invasive ductal carcinoma	0	1	0	0	1	1	1	0	1	1	1	0	0	0
I09	cancer	Ⅱ.	1	1	1	low	0	60	0	60	0	2	invasive ductal carcinoma	0	2	0	0	2	2	1	0	1	0	1	1	1
I10	cancer	Ⅱ.	2	1	2	high	1	56	0	56	0	2	invasive ductal carcinoma	0	1	2	0	2	3	1	0	1	1	1		0
I11	cancer	Ⅱ-Ⅲ.	2	1	2	high	1	49	0	49	0	2	invasive ductal carcinoma	0	1	0	0	1	1	1	0	1	1	1	1			1
I12	cancer	Ⅱ.	2	1	2	high	0	40	0	34	1	3	invasive ductal carcinoma	0	1	2	0	2	3	1	0	1	1	1	1
